# Supplementary material for: Complement dysregulation is associated with severe COVID-19 illness
Source: PubMed Central journal article supplement — Haematologica. 2021 Jul 22;107(5):1095–105. doi: 10.3324/haematol.2021.279155 (PMC9052917; doi:10.3324/haematol.2021.279155), 2021-07-22
Supplement: 2021_279155_YU_SUPPL.pdf [file 2021_279155_YU_SUPPL.pdf]

## Complement dysregulation is associated with severe COVID-19 illness

Jia Yu, Gloria F. Gerber, Hang Chen, Xuan Yuan, Shruti Chaturvedi, Evan M. Braunstein and Robert A. Brodsky

Division of Hematology, Department of Medicine, Johns Hopkins School of Medicine, Baltimore, MD, USA

©2022 Ferrata Storti Foundation. This is an open-access paper. doi:10.3324/haematol.2021.279155

Received: May 17, 2021.

Accepted: July 14, 2021.

Pre-published: July 22, 2021.

Correspondence: *ROBERT A. BRODSKY* - brodsro@jhmi.edu

---

# Complement dysregulation is associated with severe COVID-19 illness

## Supplemental Methods

### *The modified Ham test*

The modified Ham test was used to assess complement activation in patient serum as described previously.<sup>1-4</sup> Briefly, TF1 *PIGAnull* cells were maintained at a density of 500,000 cells/mL daily. The cells were washed with phosphate-buffered saline (PBS) and seeded in a round-bottom 96-well plate at a density of 6700 cells/well in 80  $\mu$ L GVB<sup>++</sup> buffer (Cat. B102, Complement Technology, Inc) in triplicate. 20  $\mu$ L of serum was added to the cells and incubated at 37°C for 45 minutes with constant shaking. Normal human serum (Cat. NHS, Complement Technology) was heated at 56°C for 30 minutes and used as a negative control (NHS(H)). As a positive control for the mHam, NHS was first incubated with Shiga toxin 1 (stx1, Cat. SML0562, Sigma-Aldrich) for 15 minutes on ice before exposure to the cells. As a positive control for APC activation, the cells were treated with 50 units of Sialidase per sample (Cat. P0720L, New England Bio Labs) at 37°C for 30 minutes, followed by addition of NHS.

After incubation of the cells and serum, the cells were washed with PBS and resuspended in 100  $\mu$ L 10% WST-1 proliferation solution (WST-1: RPMI 1640 without phenol red at a ratio of 1:9, WST-1 Cat. 11644807001, Roche, Switzerland) and incubated for 2 hours at 37°C. The absorbance of the chromogenic metabolized product was measured with a plate reader (ELX808, BioTeK, Winooski, VT) at 450 nm with a reference wavelength at 630 nm. The sample absorbance was normalized by subtracting the absorbance of a blank control, which contained WST-1 solution only.

The percentage of live cells was calculated using  $[(A_{\text{sample}} - A_{\text{blank}}) / (A_{\text{sample(H)}} - A_{\text{blank}})] \times 100$ .

The percentage of non-viable cells (100- percentage of live cells) was used as a measure of complement-mediated cell killing. All experiments were performed in triplicate.

#### *Detection of complement activity by flow cytometry*

Cell surface deposition of C5b-9 and C3c on TF1 *PIGAnull* cells was measured by flow cytometry as previously described.<sup>3-5</sup> TF1 *PIGAnull* cells were washed with PBS and seeded in a V-bottom 96-well plate ( $1.2 \times 10^5$  cells/well) in 80  $\mu\text{L}$  of either GVB<sup>++</sup> buffer or GVB<sup>0</sup>-MgEGTA buffer (pH 6.4) (GVB<sup>0</sup> Cat. B103, Complement Technology, Inc). GVB<sup>++</sup> allows for activation of all complement pathways while GVB<sup>0</sup>-MgEGTA only allows for alternative pathway activation. 20  $\mu\text{L}$  patient serum was added to the cells and incubated at 37°C for 15 minutes with constant shaking. For alternative pathway activation, NHS was acidified to pH 6.4 with 0.2 M HCl. 5 mM of ethylenediaminetetraacetic acid (EDTA) was added to NHS to inhibit complement activation and used as a negative control.

After incubation, the reaction was stopped by addition of PBS supplemented with 1% BSA and 15 mM EDTA. The cells were centrifuged at 600 g for 3 minutes and the cell pellet was collected. The cells were stained with anti-C5b-9 monoclonal antibody (Cat. Sc-58935, Santa Cruz Biotechnology, Inc, dilution at 1:100) followed by Alexa 647 conjugated secondary antibody (Cat. Ab 172325, Abcam, dilution at 1:500). The cells were also stained with Alexa 488 conjugated anti-C3c antibody (Cat.4212, Abcam, dilution at 1:150). Ten thousand events per sample were recorded using BD

FACSCalibur, and data were analyzed using FlowJo Software version 10.5.3 (FlowJo Inc).

### **Supplemental References**

1. Vaught AJ, Braunstein EM, Jasem J, et al. Germline mutations in the alternative pathway of complement predispose to HELLP syndrome. *JCI Insight*. 2018;3(6):5–7.
2. Gavriilaki E, Yuan X, Ye Z, et al. Modified Ham test for atypical hemolytic uremic syndrome. *Blood*. 2015;125(23):3637–3646.
3. Yu J, Yuan X, Chen H, Chaturvedi S, Braunstein EM, Brodsky RA. Direct activation of the alternative complement pathway by SARS-CoV-2 spike proteins is blocked by factor D Inhibition. *Blood*. 2020;136(18):2080–2089.
4. Chaturvedi S, Braunstein EM, Yuan X, et al. Complement activity and complement regulatory gene mutations are associated with thrombosis in APS and CAPS. *Blood*. 2020;135(4):239–251.
5. Yuan X, Yu J, Gerber G, et al. Ex vivo assays to detect complement activation in complementopathies. *Clin Immunol*. 2020;221:108616.
